# Supplementary material for: Delivering Optimal Care to People with Cognitive Impairment in Parkinson's Disease: A Qualitative Study of Patient, Caregiver, and Professional Perspectives
Source: Parkinsons Dis. 2023 Aug 29;2023:9732217. doi: 10.1155/2023/9732217 (PMC10480026; doi:10.1155/2023/9732217)
Supplement: Supplementary Materials — Supplementary File 1: Overview of the topic guide for interviews. Supplementary File 2: Example of analysis process. Supplementary File 3: Additional participant quotes. [file 9732217.f1.zip]

Archive with 3 entries (3 files):
- Supplement 1 - Topic Guide Overview.docx
- Supplement 2 - Example Analysis.docx
- Supplement 3 - Additional Supportive Quotes.docx
